# Supplementary material for: Revalidation and adaptation of the Menstrual Practice Needs Scale (MPNS) in a cross-sectional survey to measure the menstrual experiences of adult women working in Mukono District, Uganda
Source: HighWire-hosted journal article supplement (doi:10.1136/bmjopen-2021-057662), 2022-07-01
Supplement: bmjopen-2021-057662supp001_data_supplement.pdf [file bmjopen-2021-057662supp001_data_supplement.pdf]

## Supplementary Materials 2

Table 1. Item means, standard deviation, skew and kurtosis

| No. Item                                                                                                                                                  | Mean | SD   | Skew  | Kurtosis |
|-----------------------------------------------------------------------------------------------------------------------------------------------------------|------|------|-------|----------|
| 1. Were your menstrual materials comfortable?                                                                                                             | 2.52 | 0.83 | -1.56 | 4.28     |
| 2. Did you have enough of your menstrual materials to change them as often as you wanted to?                                                              | 2.64 | 0.71 | -1.92 | 5.78     |
| 3. Were you satisfied with the cleanliness of your menstrual materials?                                                                                   | 2.74 | 0.61 | -2.6  | 9.53     |
| 4. Could you get more of your menstrual materials when you needed to?                                                                                     | 2.56 | 0.79 | -1.64 | 4.55     |
| 5. Were you worried that your menstrual materials would allow blood to pass through to your outer garments?                                               | 1.8  | 1.12 | -0.41 | 1.78     |
| 6. Were you worried that your menstrual materials would move from place while you were wearing them?                                                      | 2.06 | 1.14 | -0.83 | 2.18     |
| 7. Were you worried about how you would get more of your menstrual material if you ran out?                                                               | 2.33 | 0.97 | -1.2  | 3.17     |
| 8. Did you feel comfortable carrying spare menstrual materials with you outside your home?                                                                | 2.06 | 1.18 | -0.78 | 1.99     |
| 9. Did you feel comfortable carrying menstrual materials to the place where you changed them?                                                             | 2.2  | 1.09 | -0.97 | 2.42     |
| 10. Did you feel comfortable storing [keeping] your leftover or cleaned menstrual materials until your next period?                                       | 2.66 | 0.83 | -2.42 | 7.46     |
| 11. Were you able to wash your hands when you wanted to?                                                                                                  | 2.72 | 0.69 | -2.53 | 8.6      |
| 12. Were you able to immediately dispose of your used menstrual materials?                                                                                | 2.65 | 0.77 | -2.23 | 6.98     |
| 13. Were you able to dispose of your used materials in the way that you wanted to?                                                                        | 2.6  | 0.83 | -2.04 | 6.02     |
| 14. Were you worried about where to dispose of your used menstrual materials?                                                                             | 2.39 | 1.05 | -1.47 | 3.58     |
| 15. Were you concerned that others would see your used menstrual materials in the place you disposed of them?                                             | 2.29 | 1.11 | -1.22 | 2.9      |
| 16. When at home, were you able to change your menstrual materials when you wanted to?                                                                    | 2.89 | 0.42 | -4.26 | 22.77    |
| 17. When at home, were you satisfied with the place you used to change your menstrual materials?                                                          | 2.83 | 0.48 | -3.17 | 13.61    |
| 18. When at home, did you have a clean place to change your menstrual materials?                                                                          | 2.86 | 0.44 | -3.7  | 17.93    |
| 19. When at home, were you worried that you would not be able to change your menstrual materials when you needed to?                                      | 2.74 | 0.72 | -2.91 | 10.53    |
| 20. When at home, were you worried that someone would see you while you were changing your menstrual materials?                                           | 2.62 | 0.82 | -2.21 | 6.75     |
| 21. When at home, were you worried that someone would harm you while I you were changing your menstrual materials?                                        | 2.87 | 0.49 | -4.46 | 23.39    |
| 22. When at home, were you worried that something else would harm you while you were changing your menstrual materials (e.g., animals, unsafe structure)? | 2.87 | 0.47 | -4.23 | 22.62    |
| 23. When at work, were you able to change your menstrual materials when you wanted to?                                                                    | 2.43 | 0.88 | -1.27 | 3.28     |
| 24. When at work, were you satisfied with the place you used to change your menstrual materials?                                                          | 2.05 | 1.15 | -0.69 | 1.9      |
| 25. When at work, did you have a clean place to change your menstrual materials?                                                                          | 2.03 | 1.13 | -0.64 | 1.86     |

|                                                                                                                      |      |      |       |      |
|----------------------------------------------------------------------------------------------------------------------|------|------|-------|------|
| 26. When at work, were you worried that you would not be able to change your menstrual materials when you needed to? | 2.14 | 1.07 | -0.85 | 2.31 |
| 27. When at work, were you worried that someone would see you while you were changing your menstrual materials?      | 2.14 | 1.17 | -0.9  | 2.17 |
| 28. When at work, were you worried that someone would harm you while you were changing your menstrual materials?     | 2.65 | 0.81 | -2.33 | 7.26 |
| <b>Among those reusing menstrual materials (n=145)</b>                                                               |      |      |       |      |
| 29. Did you have enough water to soak or wash your menstrual materials?                                              | 2.72 | 0.56 | -2.15 | 7.7  |
| 30. Did you have access to a basin or bucket to soak or wash your menstrual materials whenever you needed it?        | 2.83 | 0.43 | -2.58 | 9.16 |
| 31. Were you able to wash your menstrual materials whenever you wanted to?                                           | 2.47 | 0.86 | -1.46 | 4.01 |
| 32. Did you have enough soap to wash your menstrual materials?                                                       | 2.62 | 0.68 | -1.65 | 4.74 |
| 33. Were you able to dry your materials when you wanted to?                                                          | 2.32 | 0.93 | -1.18 | 3.3  |
| 34. Were you worried that someone would see you while you were washing your menstrual materials?                     | 2.07 | 1.15 | -0.79 | 2.07 |
| 35. Were you worried that your menstrual materials would not be dry when you needed them?                            | 2.22 | 0.94 | -0.8  | 2.38 |
| 36. Were you worried that others would see your menstrual materials while they were drying?                          | 1.96 | 1.19 | -0.62 | 1.79 |

Table 2. Intercorrelations between sub-scales/factors

| Sub-scale                                      | r (p)               | r (p)                | r (p)               | r (p)                | r (p)               | r (p)               |
|------------------------------------------------|---------------------|----------------------|---------------------|----------------------|---------------------|---------------------|
| Original sub-scales                            | Total score         | 1.                   | 2.                  | 3.                   | 4.                  | 5.                  |
| 1. Material and home environment needs (n=525) | 0.70<br>( $<.001$ ) | 1.00                 |                     |                      |                     |                     |
| 2. Insecurity (n=525)                          | 0.79<br>( $<.001$ ) | 0.33<br>( $<.001$ )  | 1.00                |                      |                     |                     |
| 3. Material reliability concerns (n=523)       | 0.64<br>( $<.001$ ) | 0.30<br>( $<.001$ )  | 0.46<br>( $<.001$ ) | 1.00                 |                     |                     |
| 4. Transport and work needs (n=483)            | 0.77<br>( $<.001$ ) | 0.43<br>( $<.001$ )  | 0.48<br>( $<.001$ ) | 0.33<br>( $<.001$ )  | 1.00                |                     |
| 5. Reuse needs (n=145)                         | 0.69<br>( $<.001$ ) | 0.52<br>( $<.001$ )  | 0.41<br>( $<.001$ ) | 0.37<br>( $<.001$ )  | 0.40<br>( $<.001$ ) | 1.00                |
| 6. Reuse insecurity (n=145)                    | 0.69<br>( $<.001$ ) | 0.37<br>( $<.001$ )  | 0.52<br>( $<.001$ ) | 0.39<br>( $<.001$ )  | 0.29<br>( $<.001$ ) | 0.38<br>( $<.001$ ) |
| <b>Revised sub-scales</b>                      |                     |                      |                     |                      |                     |                     |
| 1. Material and home environment needs (n=525) | 0.61<br>( $<.001$ ) | 1.00                 |                     |                      |                     |                     |
| 2. Material and home insecurity (n=525)        | 0.68<br>( $<.001$ ) | 0.32<br>( $<.001$ )  | 1.00                |                      |                     |                     |
| 3. Disposal (n=421)                            | 0.62<br>( $<.001$ ) | 0.11<br>( $p=.025$ ) | 0.25<br>( $<.001$ ) | 1.00                 |                     |                     |
| 4. Work practice needs (n=481)                 | 0.83<br>( $<.001$ ) | 0.33<br>( $<.001$ )  | 0.35<br>( $<.001$ ) | 0.45<br>( $<.001$ )  | 1.00                |                     |
| 5. Reuse needs (n=145)                         | 0.68<br>( $<.001$ ) | 0.49<br>( $<.001$ )  | 0.36<br>( $<.001$ ) | 0.33<br>( $p=.026$ ) | 0.45<br>( $<.001$ ) | 1.00                |
| 6. Reuse insecurity (n=145)                    | 0.69<br>( $<.001$ ) | 0.39<br>( $<.001$ )  | 0.48<br>( $<.001$ ) | 0.22<br>( $p=.141$ ) | 0.37<br>( $<.001$ ) | 0.37<br>( $<.001$ ) |
